# Supplementary material
Source: publisher site journal article supplement (https://www.dovepress.com/article/451613)
Supplement: Supplementary file 1 [file get_supplementary_file.php]

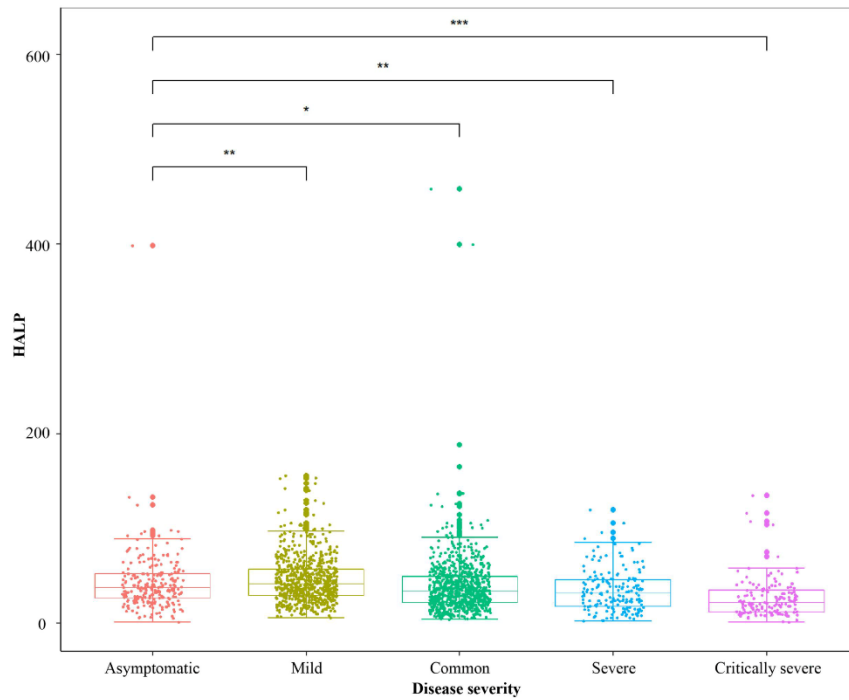

Supplementary Figure 1 Scatterplot of HALP across different disease severity. HALP, hemoglobin-albumin-lymphocyte-platelet; \*  $P < 0.05$ , \*\*  $P < 0.01$ , \*\*\*  $P < 0.001$ .

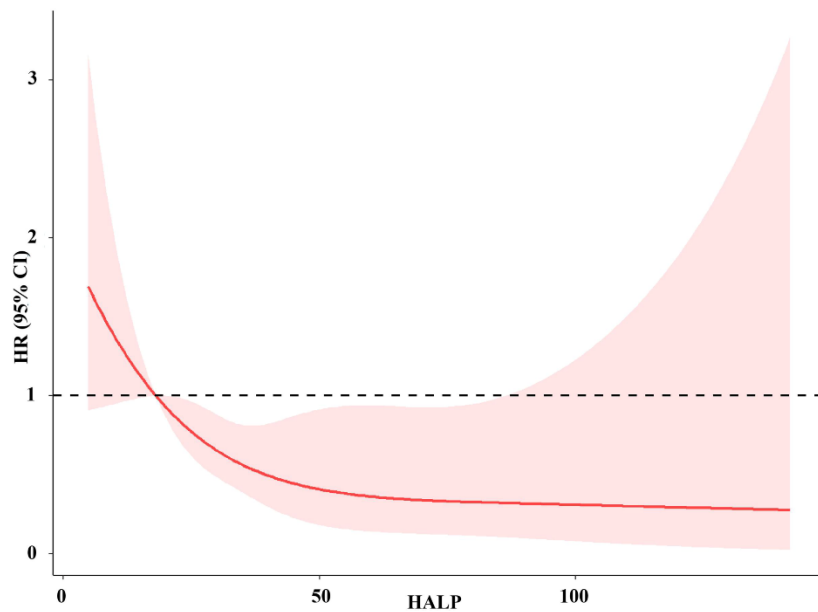

Supplementary Figure 2 Restricted cubic spline of HALP adjusted by confounding factors in COVID-19 Omicron BA.2 infected patients. HALP, hemoglobin-albumin-lymphocyte-platelet; HR, hazard ratio; CI, confidence interval.
